# Supplementary material
Source: HighWire-hosted journal article supplement (https://www.life-science-alliance.org/content/5/5/e202201379/F5)

**B**  
**In Fig.S3B**

Supplementary Figure 3.

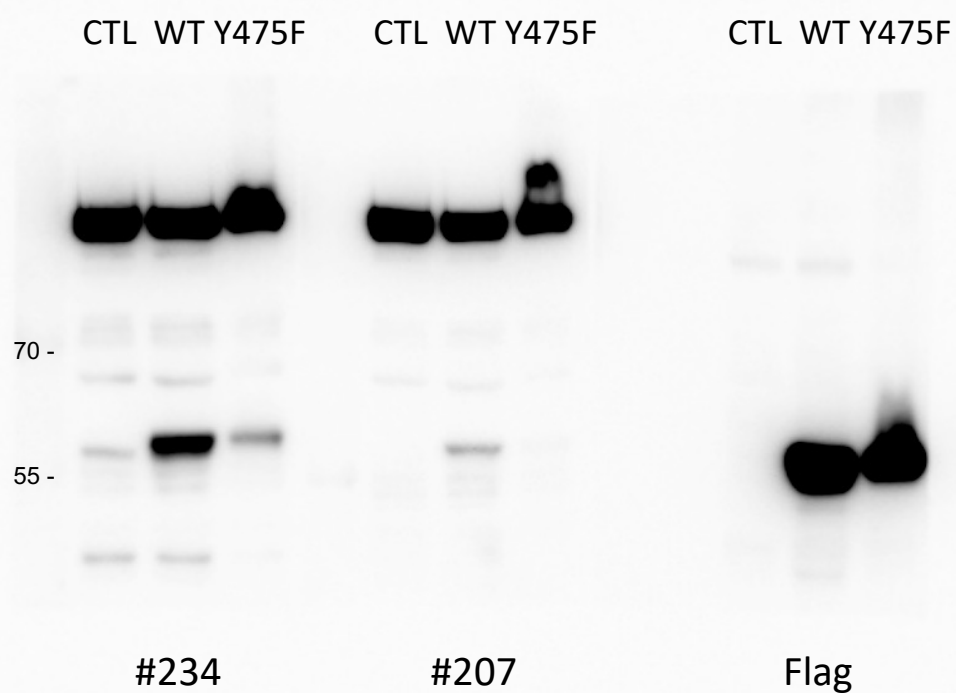

# C

## In Fig.S3C

Supplementary Figure 3.

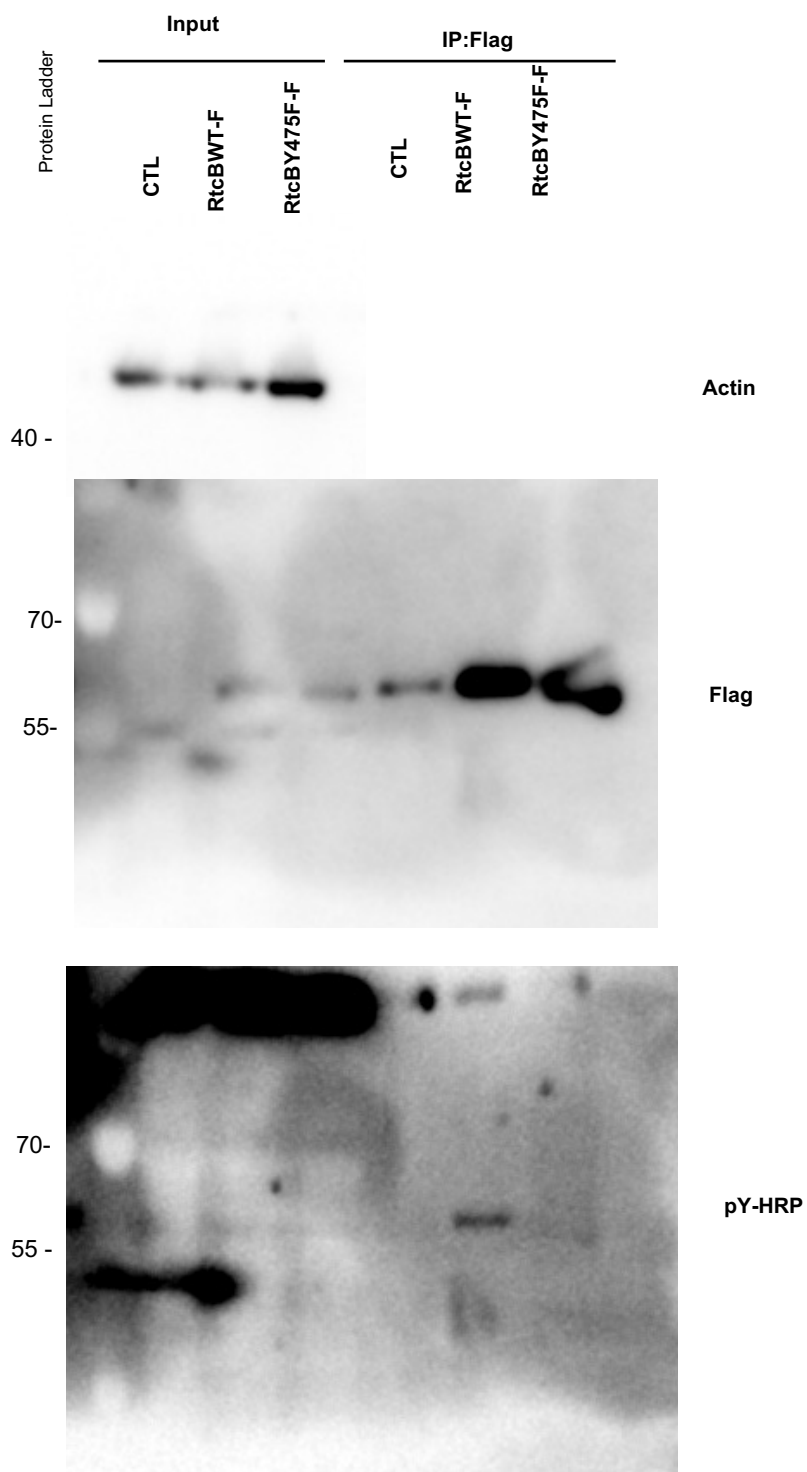

Supplement: inline-supplementary-material-5 [file inline-supplementary-material-5.zip]
